# Supplementary material
Source: Research Square preprint supplement (doi:10.21203/rs.3.rs-9267022/v1)
Supplement: Supplementary file 1 [file Fig1(f)-Western blot-COLII&GAPDH&SELS.pdf › western blot-original image - PDF/Fig1(f)-Western blot-COLII&GAPDH&SELS.pdf]

These three images are from different parts of the same PVDF membrane.

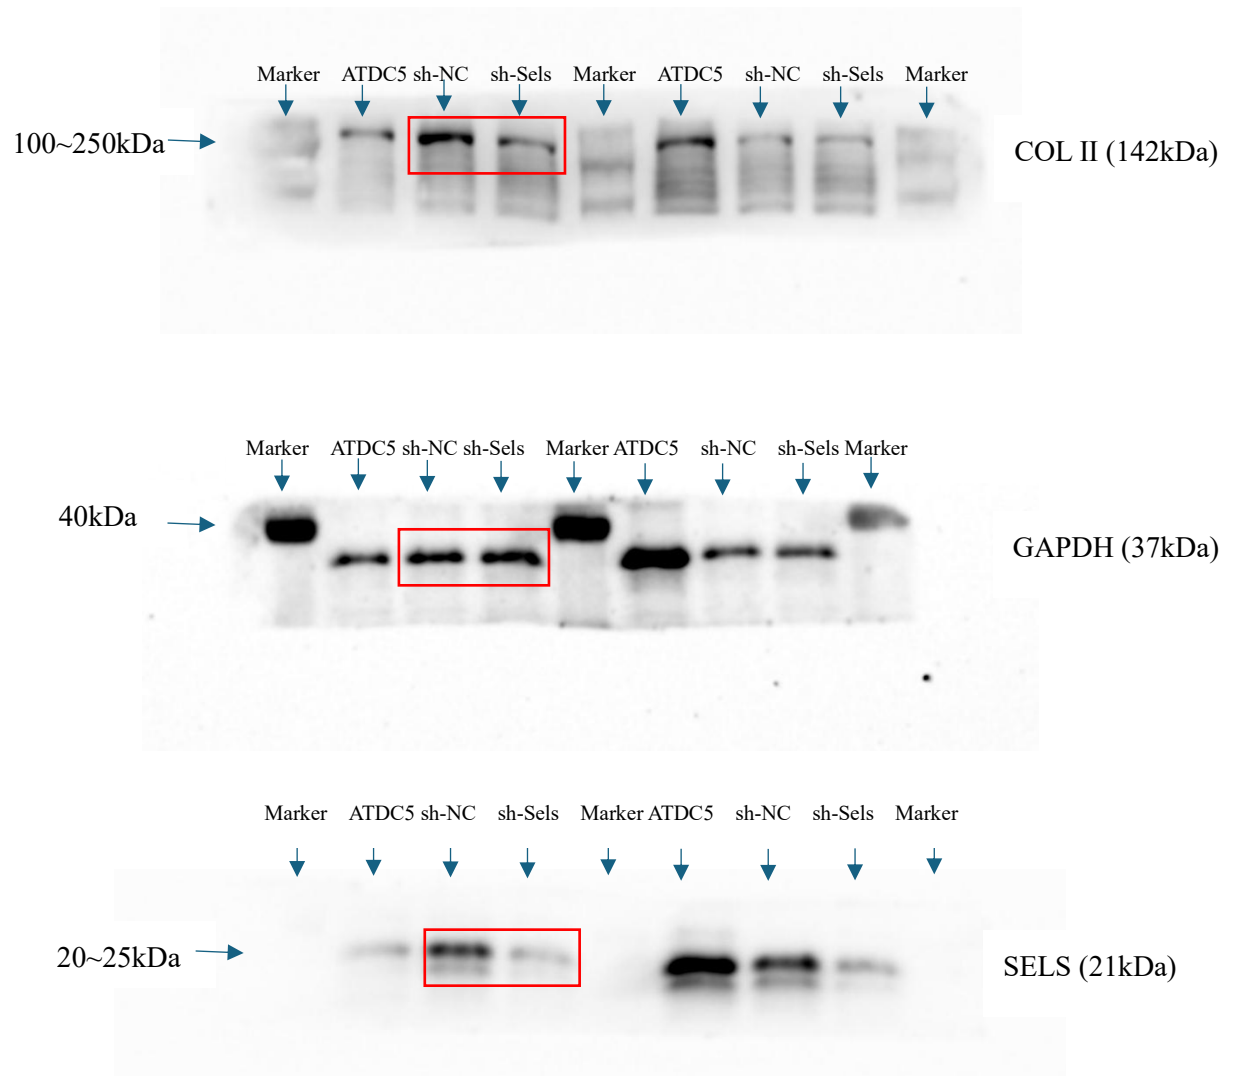

Fig 1. (f) Western blot-COL II/GAPDH/SELS
