# Supplementary material
Source: Research Square preprint supplement (doi:10.21203/rs.3.rs-9267022/v1)
Supplement: Supplementary file 2 [file Fig1(g,h)-Western blot-MMP13&MMP19&GAPDH.pdf › western blot-original image - PDF/Fig1(g,h)-Western blot-MMP13&MMP19&GAPDH.pdf]

These four images are from different parts of the same PVDF membrane.

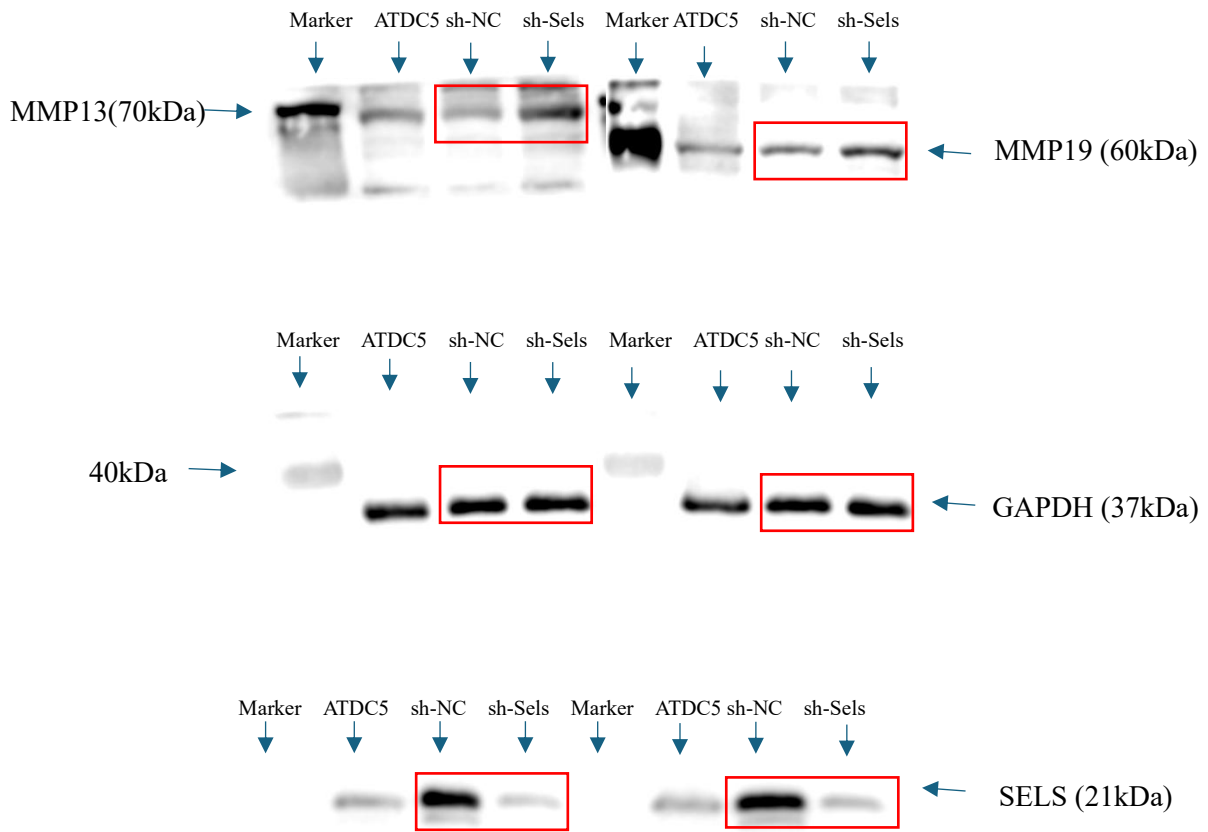

Fig 1. (g,h) Western blot-MMP13/MMP19/GAPDH/SELS
