# Supplementary material
Source: Research Square preprint supplement (doi:10.21203/rs.3.rs-9267022/v1)

These two images are from different parts of the same PVDF membrane.

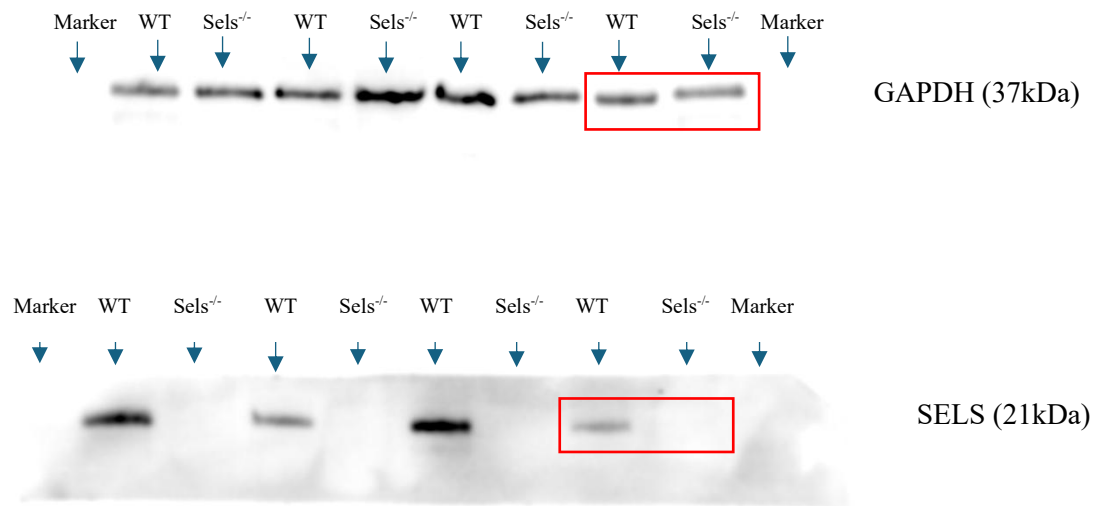

Fig 3(b). Western blot-SELS

Supplement: Supplementary file 3 [file Fig3(b)-SELS.pdf › western blot-original image - PDF/Fig3(b)-SELS.pdf]

These two images are from different parts of the same PVDF membrane.

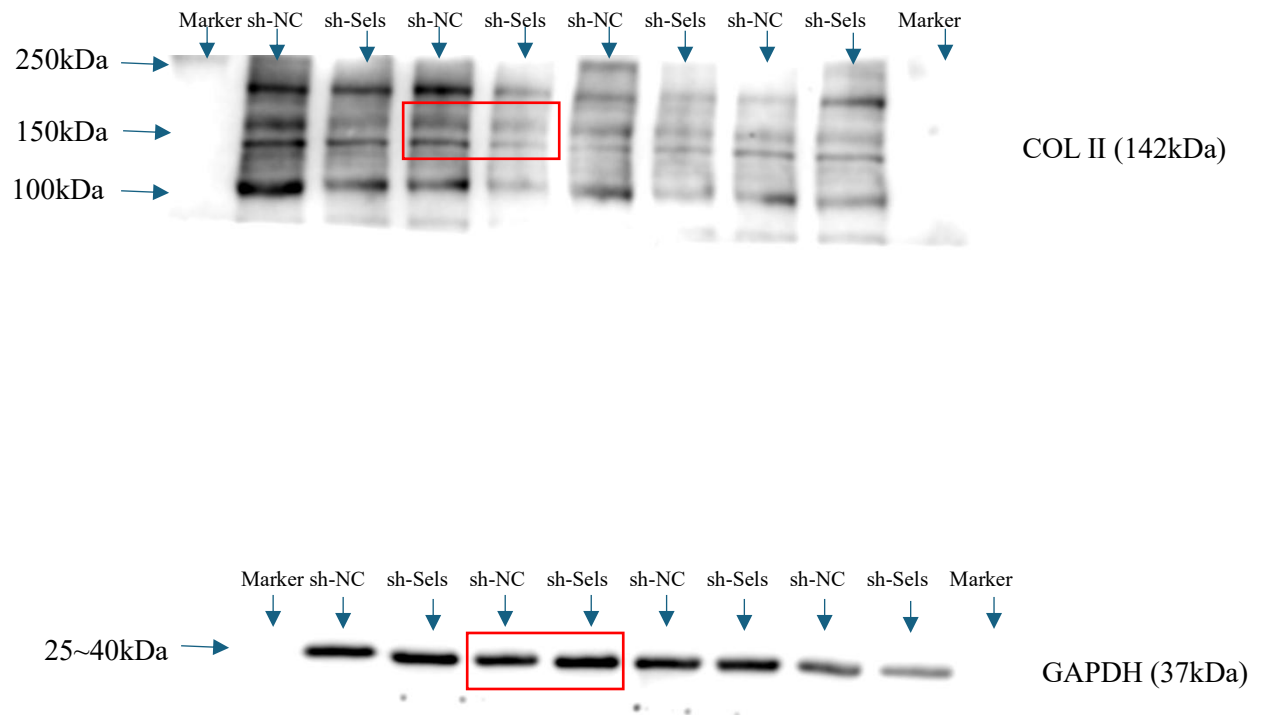

Fig 4. Western blot-COL II

Supplement: Supplementary file 4 [file Fig4-Western blot-COLII.pdf › western blot-original image - PDF/Fig4-Western blot-COLII.pdf]

These two images are from different parts of the same PVDF membrane.

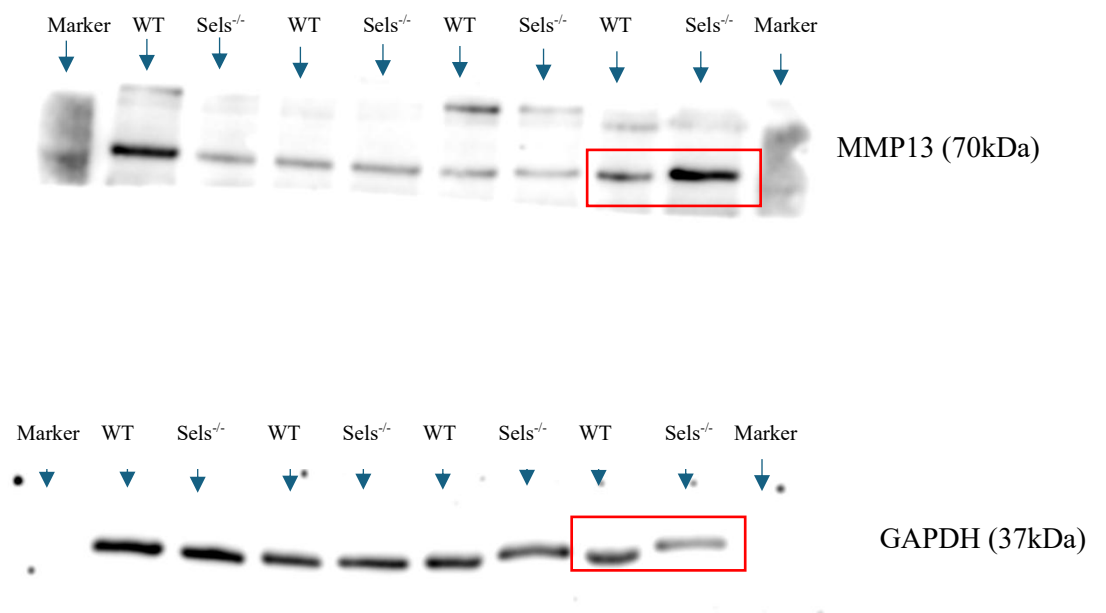

Fig 5. Western blot-MMP13

Supplement: Supplementary file 5 [file Fig5-MMP13.pdf › western blot-original image - PDF/Fig5-MMP13.pdf]

These two images are from different parts of the same PVDF membrane.

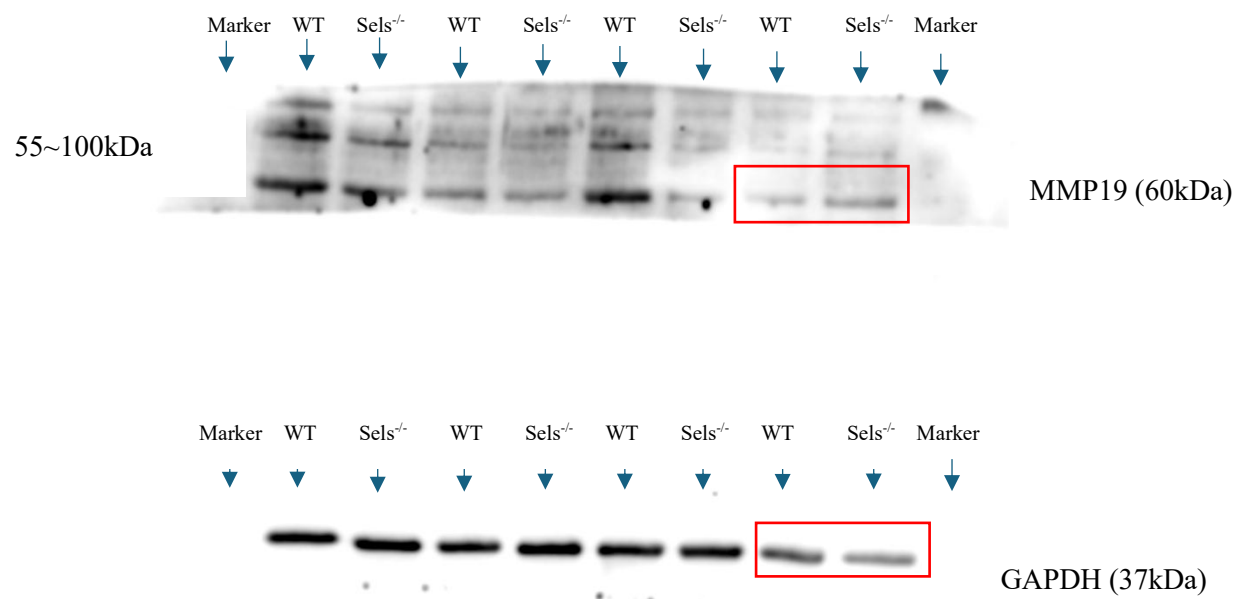

Fig 5. Western blot-MMP19

Supplement: Supplementary file 6 [file Fig5-MMP19.pdf › western blot-original image - PDF/Fig5-MMP19.pdf]
